# Supplementary material for: Executioner caspase is proximal to Fasciclin 3 which facilitates non-lethal activation in Drosophila olfactory receptor neurons
Source: eLife. 2025 Jun 17;13:RP99650. doi: 10.7554/eLife.99650 (PMC12173457; doi:10.7554/eLife.99650)
Supplement: Figure 4—figure supplement 1—source data 3. [file elife-99650-fig4-figsupp1-data3.xlsx]

## Sheet: Figure 4 - figure supplement 1D
Number of flies in each category
	No	Weak	Moderate	Strong	Total
LacZ-RNAi	37	7	0	0	44
Fas3-RNAi #1	33	10	0	0	43
Fas3-RNAi #2	38	7	0	0	45
Fas3G-RNAi	33	8	0	0	41
Ratio of flies in each category (%)
	No	Weak	Moderate	Strong	Total
LacZ-RNAi	84.0909	15.9091	0	0	100
Fas3-RNAi #1	76.7442	23.2558	0	0	100
Fas3-RNAi #2	84.4444	15.5556	0	0	100
Fas3G-RNAi	80.4878	19.5122	0	0	100
