# Supplementary material for: Executioner caspase is proximal to Fasciclin 3 which facilitates non-lethal activation in Drosophila olfactory receptor neurons
Source: eLife. 2025 Jun 17;13:RP99650. doi: 10.7554/eLife.99650 (PMC12173457; doi:10.7554/eLife.99650)
Supplement: Figure 4—source data 1. [file elife-99650-fig4-data1.xlsx]

## Sheet: Figure 4B
Cell number per antenna
V5::TurboID	DroncCG::V5::TurboID	Dronc::V5::TurboID	Dcp-1CG::V5::TurboID	Dcp-1::V5::TurboID	DriceCG::V5::TurboID	Drice::V5::TurboID
25	36	7	32	0	32	33
25	32	11	32	3	31	34
24	30	9	25	0	36	34
29	32	9	36	0	30	34
32	39	3	25	0	25	37
31	34	3	30	0	32	28
21	28	5	33	1	33	31
30	33	18	33	0	32	31
22	35	16	32	1	36	32
26	29	11	30	0	35	29
28	30	9	32	0	38	38
36	34	6	32	0	32	34
30	30	11	35	3	41	36
26	32	15	32	2	34	30
29	28	12	30	1	28	34
	34	6		3
		15
		4
		12
		11
		12
		9
		11

## Sheet: Figure 4D
Cell number per antenna
mNeonGreen	Fas3G	Drice	Fas3G, Drice
29	25	34	34
32	28	33	26
33	28	28	26
32	33	24	39
31	23	25	25
26	23	36	24
23	30	32	27
20	25	28	32
30	32	25	28
23	25	34	35
33	27	28	33
31	22	23	26
37	34	21	25
25	27	38	32
23	29	32	31
31		44
27		40
33		35
33
32
31
35
35
29
35
33
30
33
27
33
38
42
31
32
29
41
30
35
36
25
31
33
34
34

## Sheet: Figure 4G
Number of flies in each category
	No	Weak	Moderate	Strong	Total
mNeonGreen	44	5	0	1	50
Fas3G	20	27	6	0	53
Drice	15	3	0	0	18
Fas3G, Drice	3	19	31	5	58
Ratio of flies in each category (%)
	No	Weak	Moderate	Strong	Total
mNeonGreen	88	10	0	2	100
Fas3G	37.7358	50.9434	11.3208	0	100
Drice	83.3333	16.6667	0	0	100
Fas3G, Drice	5.17241	32.7586	53.4483	8.62069	100

## Sheet: Figure 4I
Number of flies in each category
	No	Weak	Moderate	Strong	Total
mNeonGreen	25	6	0	0	31
Fas3G	18	17	0	0	35
Fas3G, Diap-1::VENUS	27	6	0	0	33
Ratio of flies in each category (%)
	No	Weak	Moderate	Strong	Total
mNeonGreen	80.6452	19.3548	0	0	100
Fas3G	51.4286	48.5714	0	0	100
Fas3G, Diap-1::VENUS	81.8182	18.1818	0	0	100
