# Supplementary material for: Executioner caspase is proximal to Fasciclin 3 which facilitates non-lethal activation in Drosophila olfactory receptor neurons
Source: eLife. 2025 Jun 17;13:RP99650. doi: 10.7554/eLife.99650 (PMC12173457; doi:10.7554/eLife.99650)
Supplement: Figure 5—source data 3. [file elife-99650-fig5-data3.xlsx]

## Sheet: Figure 5D
Number of flies in each category
	No	Weak	Moderate	Strong	Total
mNeonGreen	16	9	0	0	25
Fas3G	4	19	2	0	25
Fas3G, Dronc-i	13	4	2	0	19
Fas3G, DroncDN	16	4	0	0	20
Ratio of flies in each category (%)
	No	Weak	Moderate	Strong	Total
mNeonGreen	64	36	0	0	100
Fas3G	16	76	8	0	100
Fas3G, Dronc-i	68.4211	21.0526	10.5263	0	100
Fas3G, DroncDN	80	20	0	0	100
