# Supplementary material for: Executioner caspase is proximal to Fasciclin 3 which facilitates non-lethal activation in Drosophila olfactory receptor neurons
Source: eLife. 2025 Jun 17;13:RP99650. doi: 10.7554/eLife.99650 (PMC12173457; doi:10.7554/eLife.99650)
Supplement: Figure 6—source data 1. [file elife-99650-fig6-data1.xlsx]

## Sheet: Figure 6B
	Dead	ACV	MQ	Field	Preference Index
4hStv_1%ACV_1	0	33	2	40	41.3333
4hStv_1%ACV_2	0	9	1	62	11.1111
4hStv_1%ACV_3	0	2	0	71	2.73973
4hStv_1%ACV_4	0	9	0	65	12.1622
4hStv_1%ACV_5	0	2	0	67	2.89855
4hStv_1%ACV_6	0	2	1	71	1.35135
4hStv_1%ACV_7	0	2	2	66	0
4hStv_1%ACV_8	0	16	0	58	21.6216
4hStv_1%ACV_9	0	4	1	70	4
4hStv_1%ACV_10	0	31	0	44	41.3333
4hStv_1%ACV_11	0	2	3	67	-1.38889
4hStv_1%ACV_12	1	7	1	61	8.82353
4hStv_1%ACV_13	0	2	1	71	1.35135
16hStv_25%ACV_1	9	61	0	10	98.3871
16hStv_25%ACV_2	3	67	0	7	94.3662
16hStv_25%ACV_3	4	64	0	9	92.7536
16hStv_25%ACV_4	5	69	0	5	100
16hStv_25%ACV_5	1	68	1	5	91.7808
16hStv_25%ACV_6	4	66	0	6	97.0588
16hStv_25%ACV_7	4	65	1	7	92.7536
16hStv_25%ACV_8	0	63	0	7	90
16hStv_25%ACV_9	0	64	0	9	87.6712
16hStv_25%ACV_10	1	28	0	47	37.8378
16hStv_25%ACV_11	0	67	0	8	89.3333
16hStv_25%ACV_12	0	65	0	4	94.2029
16hStv_25%ACV_13	0	51	0	22	69.863

## Sheet: Figure 6C
	Dead	ACV	MQ	Field	Preference Index
mNG_1	0	13	4	53	12.8571
mNG_2	0	52	0	22	70.2703
mNG_3	0	7	1	64	8.33333
mNG_4	0	5	5	60	0
mNG_5	0	7	3	61	5.6338
mNG_6	0	6	3	63	4.16667
mNG_7	0	2	4	69	-2.66667
mNG_8	0	1	0	73	1.35135
mNG_9	0	3	1	70	2.7027
mNG_10	0	1	0	70	1.40845
mNG_11	0	14	3	57	14.8649
mNG_12	0	2	1	72	1.33333
mNG_13	0	1	0	72	1.36986
mNG_14	0	3	0	71	4.05405
mNG_15	0	10	0	61	14.0845
mNG_16	0	11	3	55	11.5942
DroncDN_1	2	14	11	52	4
DroncDN_2	2	34	1	38	46.4789
DroncDN_3	0	2	0	69	2.8169
DroncDN_4	0	9	5	59	5.47945
DroncDN_5	0	4	2	69	2.66667
DroncDN_6	0	8	5	61	4.05405
DroncDN_7	0	7	1	66	8.10811
DroncDN_8	0	1	0	73	1.35135
DroncDN_9	0	1	1	71	0
DroncDN_10	0	1	1	72	0
DroncDN_11	1	19	3	51	22.2222
DroncDN_12	0	13	4	55	12.5
DroncDN_13	0	14	2	57	16.4384
DroncDN_14	0	4	1	64	4.34783
DroncDN_15	0	5	2	72	3.79747
Fas3G_1	0	33	13	25	28.169
Fas3G_2	0	56	5	14	68
Fas3G_3	0	16	2	51	20.2899
Fas3G_4	0	13	0	54	19.403
Fas3G_5	0	16	3	54	17.8082
Fas3G_6	0	21	0	54	28
Fas3G_7	0	8	2	62	8.33333
Fas3G_8	1	4	3	65	1.40845
Fas3G_9	1	24	4	46	27.3973
Fas3G_10	2	7	9	54	-2.94118
Fas3G_11	1	38	3	26	53.0303
Fas3G_12	0	6	4	61	2.8169
Fas3G_13	1	27	7	40	27.3973
Fas3G_14	0	1	6	65	-6.94444
Fas3G_15	5	24	2	46	32.8358
Fas3G_16	1	7	1	65	8.33333
Fas3G_17	0	3	3	69	0
Fas3G_18	0	11	2	62	12
Fas3G_19	1	5	8	59	-4.22535
Fas3G_20	0	14	9	40	7.93651
Fas3G, DroncDN_1	2	31	0	40	44.9275
Fas3G, DroncDN_2	0	15	1	49	21.5385
Fas3G, DroncDN_3	1	6	5	59	1.44928
Fas3G, DroncDN_4	0	28	1	40	39.1304
Fas3G, DroncDN_5	0	2	0	66	2.94118
Fas3G, DroncDN_6	0	14	1	61	17.1053
Fas3G, DroncDN_7	2	4	0	65	5.97015
Fas3G, DroncDN_8	1	53	2	27	62.963
Fas3G, DroncDN_9	2	15	1	55	20.2899
Fas3G, DroncDN_10	2	14	5	50	13.4328
Fas3G, DroncDN_11	0	43	1	21	64.6154
Fas3G, DroncDN_12	0	26	1	39	37.8788
Fas3G, DroncDN_13	4	42	1	27	62.1212
Fas3G, DroncDN_14	6	33	4	32	46.0317
Fas3G, DroncDN_15	2	9	1	53	13.1148
Fas3G, DroncDN_16	2	35	2	21	58.9286
Fas3G, DroncDN_17	8	7	2	40	12.1951
Fas3G, DroncDN_18	0	38	2	28	52.9412
Fas3G, DroncDN_19	1	27	8	37	26.7606
Fas3G, DroncDN_20	4	32	7	26	40.9836
