# Supplementary material for: Executioner caspase is proximal to Fasciclin 3 which facilitates non-lethal activation in Drosophila olfactory receptor neurons
Source: eLife. 2025 Jun 17;13:RP99650. doi: 10.7554/eLife.99650 (PMC12173457; doi:10.7554/eLife.99650)
Supplement: Supplementary file 1. — A list of the identified proximal proteins (Abundance ratio (Drice::V5::TurboID/Control) > 10). The UniProt Accessions, Gene Description, and Abundance Ratio (Drice::V5::TurboID/Control) are listed. [file elife-99650-supp1.xlsx]

## Sheet: S3. Drice proximal proteins
Accession	Gene Description	Abundance Ratio Drice-V5-TbID/Control
M9PHI5	Still life, isoform J OS=Drosophila melanogaster GN=sif PE=1 SV=1	100
Q9V8R9	Protein 4.1 homolog OS=Drosophila melanogaster GN=cora PE=1 SV=1	100
M9NGG5	Futsch, isoform F OS=Drosophila melanogaster GN=futsch PE=1 SV=1	100
A8DY77	DNAation factor-related protein 2, isoform B OS=Drosophila melanogaster GN=Drep2 PE=1 SV=1	100
Q8IQ62	Still life, isoform F OS=Drosophila melanogaster GN=sif PE=1 SV=2	100
M9PE98	Still life, isoform M OS=Drosophila melanogaster GN=sif PE=1 SV=1	100
A8JNM5	Ankyrin 2, isoform K OS=Drosophila melanogaster GN=Ank2 PE=1 SV=1	100
Q00963	Spectrin beta chain OS=Drosophila melanogaster GN=beta-Spec PE=1 SV=2	100
Q9V483	Unc-13, isoform C OS=Drosophila melanogaster GN=unc-13 PE=4 SV=4	100
A0A0B4JDC9	RIM-binding protein, isoform F OS=Drosophila melanogaster GN=Rbp PE=1 SV=1	100
E1JHT2	Transporter OS=Drosophila melanogaster GN=ine PE=3 SV=1	100
A4V4W0	RH38069p1 OS=Drosophila melanogaster GN=stnA PE=1 SV=1	100
M9PHK8	Discs large 1, isoform R OS=Drosophila melanogaster GN=dlg1 PE=1 SV=1	100
A0A0B4KFC5	Lingerer, isoform K OS=Drosophila melanogaster GN=lig PE=1 SV=1	100
O62621	Coatomer subunit beta' OS=Drosophila melanogaster GN=beta'COP PE=2 SV=2	100
Q9VSZ1	CG3529, isoform B OS=Drosophila melanogaster GN=Dmel\CG3529 PE=1 SV=2	100
A8JR71	CASK ortholog, isoform D OS=Drosophila melanogaster GN=CASK PE=1 SV=1	100
Q8MMD2	Epidermal growth factor receptor pathway substrate clone 15, isoform B OS=Drosophila melanogaster GN=Eps-15 PE=1 SV=1	100
Q9VCE7	Krueppel target at 95D, isoform A OS=Drosophila melanogaster GN=KrT95D PE=1 SV=3	100
Q7PLI0	Adherens junction protein p120 OS=Drosophila melanogaster GN=p120ctn PE=1 SV=1	100
Q00748	Multidrug resistance protein homolog 65 OS=Drosophila melanogaster GN=Mdr65 PE=1 SV=2	100
A1ZB79	CG5174, isoform M OS=Drosophila melanogaster GN=CG5174 PE=1 SV=2	100
E1JIZ0	Scribbled, isoform L OS=Drosophila melanogaster GN=scrib PE=1 SV=1	100
P36975	Synaptosomal-associated protein 25 OS=Drosophila melanogaster GN=Snap25 PE=2 SV=1	100
A1Z9J3	Short stop, isoform H OS=Drosophila melanogaster GN=shot PE=1 SV=1	100
A8JNX5	Nicotinic acetylcholine receptor alpha4, isoform C OS=Drosophila melanogaster GN=nAChRalpha4 PE=3 SV=2	100
A0A1L4AAF3	Uncharacterized protein, isoform A OS=Drosophila melanogaster GN=Dmel\CG46320 PE=4 SV=1	100
E1JJ33	Complexin, isoform U OS=Drosophila melanogaster GN=cpx PE=1 SV=1	100
X2JC00	Rho GTPase activating protein at 1A, isoform E OS=Drosophila melanogaster GN=RhoGAP1A PE=1 SV=1	100
Q9VB05	ALG-2 interacting protein X OS=Drosophila melanogaster GN=ALiX PE=1 SV=1	100
B5RIU6	AT06279p OS=Drosophila melanogaster GN=EndoA PE=1 SV=1	100
Q7KT97	Nicotinic acetylcholine receptor alpha5, isoform B OS=Drosophila melanogaster GN=nAChRalpha5 PE=3 SV=1	100
Q9VJ94	Dipeptidase OS=Drosophila melanogaster GN=CG42750 PE=3 SV=5	100
Q8IPC5	Cylindromatosis ortholog, isoform D OS=Drosophila melanogaster GN=CYLD PE=1 SV=1	100
Q9VML2	Blue cheese OS=Drosophila melanogaster GN=bchs PE=4 SV=4	100
P51140	Segment polarity protein dishevelled OS=Drosophila melanogaster GN=dsh PE=1 SV=2	100
Q8IQX3	Uncharacterized protein, isoform A OS=Drosophila melanogaster GN=CG32544 PE=1 SV=1	100
O97428	Ciboulot, isoform A OS=Drosophila melanogaster GN=cib PE=1 SV=1	100
Q9VXF1	Serine/threonine-protein phosphatase 2B catalytic subunit 3 OS=Drosophila melanogaster GN=CanA-14F PE=1 SV=4	100
Q8MQS4	GH06923p OS=Drosophila melanogaster GN=Reps PE=1 SV=1	100
Q9VQU7	Uncharacterized protein, isoform B OS=Drosophila melanogaster GN=CG10019 PE=4 SV=2	100
Q9VRY6	LD14015p OS=Drosophila melanogaster GN=Dmel\CG10103 PE=1 SV=1	100
Q9W1X4	Nuclear pore complex protein Nup214 OS=Drosophila melanogaster GN=Nup214 PE=1 SV=2	100
Q9V429	Thioredoxin-2 OS=Drosophila melanogaster GN=Trx-2 PE=1 SV=2	100
X2JAT7	Fasciclin 3, isoform G OS=Drosophila melanogaster GN=Fas3 PE=4 SV=1	100
M9MRJ4	Muscle-specific protein 300 kDa, isoform G OS=Drosophila melanogaster GN=Msp300 PE=1 SV=1	100
O01382	Caspase OS=Drosophila melanogaster GN=Drice PE=1 SV=2	100
Q9W3Y3	CG3226 OS=Drosophila melanogaster GN=CG3226 PE=1 SV=1	100
B7YZS3	Tamo, isoform B OS=Drosophila melanogaster GN=tamo PE=4 SV=1	100
O46084	Serine/threonine-protein phosphatase Pgam5, mitochondrial OS=Drosophila melanogaster GN=Pgam5 PE=1 SV=1	100
Q9VEV3	LP07287p OS=Drosophila melanogaster GN=CG14894 PE=1 SV=2	100
A4V1P2	Orb2, isoform B OS=Drosophila melanogaster GN=orb2 PE=4 SV=1	100
A0A0B4KI34	CIN85 and CD2AP orthologue, isoform J OS=Drosophila melanogaster GN=cindr PE=1 SV=1	100
M9PHV3	Rho GTPase activating protein p190, isoform F OS=Drosophila melanogaster GN=RhoGAPp190 PE=1 SV=1	100
M9PBZ1	Resistant to dieldrin, isoform G OS=Drosophila melanogaster GN=Rdl PE=3 SV=1	100
X2JCY0	Lethal (1) G0196, isoform O OS=Drosophila melanogaster GN=l(1)G0196 PE=1 SV=1	100
X2JA38	Tweek, isoform J OS=Drosophila melanogaster GN=tweek PE=4 SV=1	100
Q9VV89	Coat protein (Coatomer) zeta, isoform A OS=Drosophila melanogaster GN=zetaCOP PE=1 SV=2	100
B7Z0Z0	Dorsal switch protein 1, isoform F OS=Drosophila melanogaster GN=Dsp1 PE=1 SV=1	100
Q9W2U7	LP18708p OS=Drosophila melanogaster GN=nocte PE=1 SV=4	100
M9NH88	Wings up A, isoform J OS=Drosophila melanogaster GN=wupA PE=1 SV=1	100
P54359	Septin-2 OS=Drosophila melanogaster GN=Sep2 PE=2 SV=2	100
Q9W5R5	LD47843p OS=Drosophila melanogaster GN=Slmap PE=1 SV=2	100
Q7K3Z3	GH01724p OS=Drosophila melanogaster GN=p47 PE=1 SV=1	100
Q9VDE9	FI04035p OS=Drosophila melanogaster GN=RhoGAP93B PE=2 SV=2	100
Q9W350	C11.1, isoform A OS=Drosophila melanogaster GN=c11.1 PE=1 SV=2	100
Q9VJD2	Ragulator complex protein LAMTOR3 homolog OS=Drosophila melanogaster GN=CG5110 PE=2 SV=1	100
Q9V491	Plexin A, isoform A OS=Drosophila melanogaster GN=PlexA PE=1 SV=1	100
A1ZBJ6	Rad, Gem/Kir family member 1, isoform B OS=Drosophila melanogaster GN=Rgk1 PE=4 SV=2	100
A0A0B4KFZ4	Tetraspanin OS=Drosophila melanogaster GN=TM4SF PE=3 SV=1	100
M9PFU0	Uncharacterized protein, isoform A OS=Drosophila melanogaster GN=CG43778 PE=4 SV=1	100
O02002	Caspase-1 OS=Drosophila melanogaster GN=Dcp-1 PE=1 SV=1	100
P26675	Protein son of sevenless OS=Drosophila melanogaster GN=Sos PE=1 SV=2	100
Q7K0D8	Nuclear pore complex protein Nup50 OS=Drosophila melanogaster GN=Nup50 PE=2 SV=1	100
A0A0B4K6W9	Hephaestus, isoform Y OS=Drosophila melanogaster GN=heph PE=1 SV=1	100
Q9W1I8	LD03592p OS=Drosophila melanogaster GN=Snap29 PE=1 SV=1	100
M9PBD9	Ran GTPase activating protein, isoform B OS=Drosophila melanogaster GN=RanGAP PE=1 SV=1	100
P17644	Acetylcholine receptor subunit alpha-like 2 OS=Drosophila melanogaster GN=nAChRalpha2 PE=2 SV=1	100
A0A0B4LGH8	Oxysterol-binding protein OS=Drosophila melanogaster GN=CG3860 PE=1 SV=1	100
Q9VGU5	Tetratricopeptide repeat protein 14 homolog OS=Drosophila melanogaster GN=CG6621 PE=1 SV=2	100
E2QD98	Stardust, isoform G OS=Drosophila melanogaster GN=sdt PE=1 SV=1	100
Q32KD4	Argonaute-1, isoform A OS=Drosophila melanogaster GN=AGO1 PE=1 SV=1	100
Q9V3Y2	Anamorsin homolog OS=Drosophila melanogaster GN=CIAPIN1 PE=2 SV=1	100
A0A0B4LF57	Calmodulin, isoform C OS=Drosophila melanogaster GN=Cam PE=1 SV=1	100
A0A0B4K725	Multiple ankyrin repeats single KH domain, isoform C OS=Drosophila melanogaster GN=mask PE=4 SV=1	100
Q9V393	Kurtz arrestin OS=Drosophila melanogaster GN=krz PE=1 SV=1	100
Q9VSW1	LD13601p OS=Drosophila melanogaster GN=UGP PE=1 SV=2	100
Q9VV52	LD37257p OS=Drosophila melanogaster GN=RAF2 PE=1 SV=3	100
Q9VAQ7	Pre-mRNA-splicing factor Slu7 OS=Drosophila melanogaster GN=Slu7 PE=1 SV=2	100
A8JUQ9	Vav ortholog, isoform C OS=Drosophila melanogaster GN=Vav PE=1 SV=1	100
A0A0B4KEY4	Patronin, isoform I OS=Drosophila melanogaster GN=Patronin PE=1 SV=1	100
Q8IPI3	Anion exchange protein OS=Drosophila melanogaster GN=Ndae1 PE=1 SV=2	100
A1ZAC7	Fidipidine OS=Drosophila melanogaster GN=fidipidine PE=1 SV=1	100
Q9VZK7	Uncharacterized protein, isoform B OS=Drosophila melanogaster GN=Dmel\CG14982 PE=4 SV=2	100
A0A0B4KG03	Flyers-cup, isoform F OS=Drosophila melanogaster GN=f-cup PE=4 SV=1	100
M9PC99	Sec24CD ortholog, isoform C OS=Drosophila melanogaster GN=Sec24CD PE=1 SV=1	100
Q9W3K6	CG2258, isoform A OS=Drosophila melanogaster GN=CG2258 PE=1 SV=1	100
Q9W0M7	FI04459p OS=Drosophila melanogaster GN=Sf3b3 PE=1 SV=2	100
Q9VJ68	FI20105p1 OS=Drosophila melanogaster GN=CG31751-RA PE=1 SV=2	100
A8DZ29	Eukaryotic translation initiation factor 4G, isoform B OS=Drosophila melanogaster GN=eIF4G1 PE=1 SV=1	100
Q8SY33	Protein Gawky OS=Drosophila melanogaster GN=gw PE=1 SV=1	100
E1JH59	Myb-interacting protein 120, isoform B OS=Drosophila melanogaster GN=mip120 PE=1 SV=1	100
P35220	Catenin alpha OS=Drosophila melanogaster GN=alpha-Cat PE=1 SV=2	100
Q9VAM6	CDGSH iron-sulfur domain-containing protein 2 homolog OS=Drosophila melanogaster GN=Cisd2 PE=2 SV=1	100
M9PFS6	Brahma, isoform E OS=Drosophila melanogaster GN=brm PE=4 SV=1	100
M9PE71	Neuronal synaptobrevin, isoform J OS=Drosophila melanogaster GN=nSyb PE=1 SV=1	100
Q9XZ14	Protein gone early OS=Drosophila melanogaster GN=goe PE=2 SV=1	100
M9NE68	Heat shock protein 23, isoform B OS=Drosophila melanogaster GN=Hsp23 PE=3 SV=1	100
Q9VK85	Ef1alpha-like factor, isoform A OS=Drosophila melanogaster GN=eRF3 PE=1 SV=1	100
B7Z126	Tousled-like kinase, isoform G OS=Drosophila melanogaster GN=Tlk PE=1 SV=1	100
P91685	Metabotropic glutamate receptor OS=Drosophila melanogaster GN=mGluR PE=1 SV=2	100
Q9W1F7	CG2970, isoform A OS=Drosophila melanogaster GN=CG2970 PE=1 SV=2	100
E1JJR3	Pacman, isoform B OS=Drosophila melanogaster GN=pcm PE=1 SV=1	100
M9MRZ7	Shaker cognate b, isoform M OS=Drosophila melanogaster GN=Shab PE=3 SV=1	100
A0A0B4KEU2	Scribbler, isoform J OS=Drosophila melanogaster GN=sbb PE=1 SV=1	100
Q59DX2	Bitesize, isoform G OS=Drosophila melanogaster GN=btsz PE=4 SV=3	100
P81900	cAMP-dependent protein kinase type II regulatory subunit OS=Drosophila melanogaster GN=Pka-R2 PE=1 SV=2	100
M9NDH7	Milton, isoform D OS=Drosophila melanogaster GN=milt PE=4 SV=1	100
M9PGG4	Armadillo, isoform F OS=Drosophila melanogaster GN=arm PE=4 SV=1	100
Q9V463	Nucleoporin 154kD, isoform A OS=Drosophila melanogaster GN=Nup154 PE=1 SV=1	100
Q0KI33	CG7956, isoform F OS=Drosophila melanogaster GN=CG7956 PE=1 SV=2	100
Q86DS1	Hsc70-interacting protein 2 OS=Drosophila melanogaster GN=HIP-R PE=1 SV=2	100
Q8IN05	Liquid facets-Related, isoform D OS=Drosophila melanogaster GN=lqfR PE=1 SV=2	100
Q9V3Q9	IP03705p OS=Drosophila melanogaster GN=GABA-B-R1 PE=2 SV=3	100
A4V2C3	Uncharacterized protein, isoform F OS=Drosophila melanogaster GN=CAMKIIB PE=1 SV=1	100
Q9VYK6	Tomosyn ortholog, isoform C OS=Drosophila melanogaster GN=Tomosyn PE=1 SV=3	100
Q9W0S2	Rho guanine nucleotide exchange factor 3, isoform L OS=Drosophila melanogaster GN=RhoGEF3 PE=4 SV=5	100
Q9I7T7	La-related protein CG11505 OS=Drosophila melanogaster GN=CG11505 PE=1 SV=2	100
A8DY97	Uncharacterized protein, isoform C OS=Drosophila melanogaster GN=CG30015 PE=1 SV=1	100
A0A0B4K7Q6	Myoblast city, isoform B OS=Drosophila melanogaster GN=mbc PE=3 SV=1	100
Q00174	Laminin subunit alpha OS=Drosophila melanogaster GN=LanA PE=1 SV=2	100
X2JEI9	Rho GTPase activating protein at 19D, isoform D OS=Drosophila melanogaster GN=RhoGAP19D PE=1 SV=1	100
P25455	1-phosphatidylinositol 4,5-bisphosphate phosphodiesterase classes I and II OS=Drosophila melanogaster GN=Plc21C PE=2 SV=3	100
P23226	205 kDa microtubule-associated protein OS=Drosophila melanogaster GN=Map205 PE=1 SV=2	100
P21187	Polyadenylate-binding protein OS=Drosophila melanogaster GN=pAbp PE=1 SV=3	100
M9PHT1	Grunge, isoform J OS=Drosophila melanogaster GN=Gug PE=1 SV=1	100
M9MRX4	Ankyrin 2, isoform U OS=Drosophila melanogaster GN=Ank2 PE=1 SV=1	30.904
A0A0S0X7W8	Protein tweety homolog OS=Drosophila melanogaster GN=CG3638 PE=3 SV=1	30.171
Q9VS41	Unc-13-4A, isoform B OS=Drosophila melanogaster GN=unc-13-4A PE=4 SV=4	28.063
Q9VB15	Microtubule-associated protein OS=Drosophila melanogaster GN=tau PE=1 SV=3	26.144
A8DYJ2	Hu li tai shao, isoform P OS=Drosophila melanogaster GN=hts PE=1 SV=2	23.831
A0A0B4K897	CG5174, isoform O OS=Drosophila melanogaster GN=CG5174 PE=1 SV=1	21.866
A0A0B4LH71	Synapse-associated protein 47kD, isoform K OS=Drosophila melanogaster GN=Sap47 PE=1 SV=1	21.357
X2JE21	Mind-meld, isoform J OS=Drosophila melanogaster GN=mmd PE=4 SV=1	20.403
A0A0B4K631	Like-AP180, isoform F OS=Drosophila melanogaster GN=lap PE=1 SV=1	18.369
Q0E8S7	Homer, isoform E OS=Drosophila melanogaster GN=homer PE=1 SV=2	16.417
M9PDW8	Uncharacterized protein, isoform T OS=Drosophila melanogaster GN=CG34417 PE=1 SV=1	15.889
Q8IRI6	Glucose transporter type 1 OS=Drosophila melanogaster GN=Glut1 PE=2 SV=4	14.243
Q7K3J0	CG8258 OS=Drosophila melanogaster GN=CCT8 PE=1 SV=1	13.841
A0A0B4JCZ4	Syntaxin 1A, isoform B OS=Drosophila melanogaster GN=Syx1A PE=3 SV=1	13.005
Q9W0L6	GH22266p OS=Drosophila melanogaster GN=Dmel\CG13907 PE=1 SV=1	12.921
A8JQT5	Chondrocyte-derived ezrin-like domain containing protein ortholog, isoform G OS=Drosophila melanogaster GN=Cdep PE=1 SV=2	12.67
Q9VDF4	Cortactin, isoform A OS=Drosophila melanogaster GN=Cortactin PE=1 SV=1	11.952
Q9VIF7	Dynamin associated protein 160, isoform A OS=Drosophila melanogaster GN=Dap160 PE=1 SV=1	11.465
M9PF36	CG3529, isoform C OS=Drosophila melanogaster GN=Dmel\CG3529 PE=1 SV=1	11.148
A1Z9M5	Uncharacterized protein OS=Drosophila melanogaster GN=CG30069 PE=1 SV=1	10.897
A0A0B4LID6	GluClalpha, isoform N OS=Drosophila melanogaster GN=GluClalpha PE=3 SV=1	10.173
Q8SX68	Uncharacterized protein CG10915 OS=Drosophila melanogaster GN=CG10915 PE=1 SV=1	10.025
