# Supplementary material for: Executioner caspase is proximal to Fasciclin 3 which facilitates non-lethal activation in Drosophila olfactory receptor neurons
Source: eLife. 2025 Jun 17;13:RP99650. doi: 10.7554/eLife.99650 (PMC12173457; doi:10.7554/eLife.99650)
Supplement: Supplementary file 2. — The result of GO analysis of Cellular Compartment for Drice-proximal proteins. GO term, p-values, Fold Enrichment, Count, and Genes are listed. [file elife-99650-supp2.xlsx]

## Sheet: S4. GO analysis
Term	PValue	Pvalue (-log10P)	Fold Enrichment	Count	Genes
GO:0031594~neuromuscular junction	5.39452e-11	10.268	12.6575	14	M9MRX4, A8JNM5, Q9VML2, Q9V483, Q8MMD2, A0A0B4JDC9, E1JIZ0, Q9VYK6, Q00963, X2JAT7, A8JR71, X2JA38, M9PHK8, E1JJ33, M9NGG5
GO:0005886~plasma membrane	2.16789e-09	8.66396	2.81461	40	Q8IN05, A8JNM5, P51140, Q8IPI3, A0A0B4LID6, Q9V8R9, Q9VYK6, A0A0B4JCZ4, P35220, Q9W1I8, Q7K3J0, O01382, A8JR71, E2QD98, P26675, Q8MQS4, A0A0B4LF57, M9MRX4, Q9V483, M9MRZ7, A1ZBJ6, Q8MMD2, Q9VDF4, Q9XZ14, Q0E8S7, Q7PLI0, Q9VIF7, P36975, A8DYJ2, P91685, Q00963, M9PE71, Q59DX2, Q9W1F7, M9PBZ1, X2JAT7, A0A0S0X7W8, E1JHT2, M9PHK8, M9PGG4, P81900
GO:0008021~synaptic vesicle	2.06842e-07	6.68436	11.2686	10	Q9V483, A0A0B4JCZ4, Q9VYK6, Q8MMD2, A4V4W0, Q9VS41, M9PE71, A0A0B4K631, Q00174, Q9VIF7
GO:0005737~cytoplasm	2.69565e-07	6.56934	1.97214	54	Q8IN05, P51140, Q7K3Z3, B7YZS3, A8JUQ9, O02002, A0A0B4KFC5, A0A0B4K7Q6, A4V2C3, Q32KD4, A0A0B4LH71, A0A0B4KEY4, P35220, P23226, B5RIU6, Q8SX68, Q8MQS4, A0A0B4K6W9, Q9VIF7, P36975, A8DYJ2, M9MRJ4, Q8SY33, Q9W3Y3, Q9VSW1, M9PGG4, P81900, A4V1P2, X2JCY0, Q9VDE9, A0A0B4K897, Q9VYK6, O01382, P21187, Q9W350, Q9VB15, Q9V3Y2, A1ZB79, M9PBD9, A0A0B4LF57, A1Z9J3, Q9V463, Q9VML2, Q8MMD2, X2JEI9, M9NE68, Q0E…
GO:0045211~postsynaptic membrane	5.65142e-07	6.24784	12.2769	9	P17644, E1JIZ0, Q9V483, M9PBZ1, A8JNX5, M9PHK8, A8DY77, A0A0B4LID6, Q7KT97
GO:0005912~adherens junction	3.95063e-06	5.40333	11.9621	8	E1JIZ0, Q9V8R9, P35220, E2QD98, A8JQT5, Q7PLI0, M9PGG4, A1Z9J3
GO:0045202~synapse	1.51121e-05	4.82068	5.30138	12	M9MRZ7, M9PE98, A0A0B4LID6, Q7KT97, P17644, A0A0B4LH71, M9PBZ1, A8JNX5, P21187, Q8IQ62, M9PHK8, M9PHI5, M9NGG5, A4V1P2
GO:0043195~terminal bouton	3.07784e-05	4.51175	11.3391	7	M9MRX4, A8JNM5, Q9V483, A0A0B4JCZ4, M9PE71, M9PHK8, E1JJ33, P36975
GO:0031201~SNARE complex	3.48638e-05	4.45763	15.5507	6	A0A0B4JCZ4, Q9VYK6, Q9W1I8, M9PE71, E1JJ33, P36975
GO:0043005~neuron projection	8.46453e-05	4.0724	6.30434	9	P17644, Q9V483, M9PBZ1, A8JNX5, Q9VB15, M9PHK8, A0A0B4LID6, Q7KT97, A4V1P2
GO:0005856~cytoskeleton	9.60255e-05	4.01761	6.19276	9	A1Z9M5, M9MRX4, A8JNM5, Q9V8R9, A8DYJ2, O97428, Q9VDE9, A8JQT5, M9PHK8, A1Z9J3
GO:0005829~cytosol	9.87639e-05	4.0054	2.03317	33	P51140, Q9W0S2, Q9I7T7, Q7K3Z3, X2JCY0, Q9VDE9, A0A0B4LGH8, A8JUQ9, O02002, M9PHT1, M9PHV3, A8DZ29, P21187, B5RIU6, P26675, M9PBD9, A0A0B4LF57, Q9V463, O97428, M9NE68, A0A0B4K6W9, A0A0B4K725, Q8IPC5, Q86DS1, M9MRJ4, Q9VK85, Q9VSW1, Q9V393, M9PGG4, M9NGG5, A4V1P2, E1JJ33
GO:0098793~presynapse	0.000328778	3.4831	7.45582	7	Q8IN05, A1ZBJ6, A8DYJ2, Q9W1I8, B5RIU6, X2JA38, A4V1P2
GO:0061174~type I terminal bouton	0.000412228	3.38486	25.9178	4	A8JR71, B5RIU6, M9PHK8, E1JJ33
GO:0030496~midbody	0.0006942	3.15852	12.149	5	A0A0B4KEY4, P23226, Q9VB05, A0A0B4KI34, A0A0B4LF57
GO:0045169~fusome	0.00121358	2.91593	10.5072	5	E1JIZ0, A8DYJ2, Q00963, A0A0B4KI34, A1Z9J3
GO:0030054~cell junction	0.00170057	2.76941	16.3692	4	E1JIZ0, Q9V8R9, Q00963, M9PHK8
GO:0005892~acetylcholine-gated channel complex	0.00326077	2.48668	33.3229	3	P17644, A8JNX5, Q7KT97
GO:0045179~apical cortex	0.00345963	2.46097	7.93403	5	P51140, E2QD98, M9PHK8, A0A0B4KI34, Q9VIF7
GO:0042734~presynaptic membrane	0.0038169	2.41829	12.4406	4	M9MRX4, A8JNM5, Q9V483, M9PHK8, Q9VIF7
GO:0016328~lateral plasma membrane	0.0038169	2.41829	12.4406	4	E1JIZ0, A8DYJ2, Q00963, M9PHK8
GO:0005918~septate junction	0.00427481	2.36908	11.9621	4	E1JIZ0, Q9V8R9, E2QD98, M9PHK8
GO:0005920~smooth septate junction	0.00431138	2.36538	29.1576	3	Q9V8R9, X2JAT7, M9PHK8
GO:0048786~presynaptic active zone	0.00528708	2.27678	11.1076	4	Q9VML2, Q9V483, M9PE71, E1JJ33
GO:0048471~perinuclear region of cytoplasm	0.00583534	2.23393	5.18357	6	Q8IPC5, Q32KD4, M9MRJ4, M9PHK8, M9PBD9, A4V1P2
GO:0016020~membrane	0.00588213	2.23047	2.27349	15	Q8IN05, A1ZBJ6, M9PF36, A0A0B4LGH8, M9PE98, Q8IRI6, P36975, M9PFU0, A0A0B4JCZ4, Q59DX2, Q9W1F7, Q9VSZ1, B5RIU6, Q8IQ62, M9PHI5, X2JC00, E1JJ33, A1Z9J3
GO:0034707~chloride channel complex	0.00982806	2.00753	19.4384	3	M9PBZ1, A0A0S0X7W8, A0A0B4LID6
GO:0014069~postsynaptic density	0.00982806	2.00753	19.4384	3	E1JIZ0, A8DYJ2, Q0E8S7
GO:0000932~P-body	0.0142694	1.84559	7.77535	4	Q32KD4, Q8SY33, A0A0B4KFC5, E1JJR3
GO:0031965~nuclear membrane	0.0232086	1.63435	6.47946	4	Q9V463, Q9W1X4, Q7K0D8, M9PBD9
GO:1990124~messenger ribonucleoprotein complex	0.0240231	1.61937	12.2769	3	O02002, E1JJR3, A4V1P2
GO:0098894~extrinsic component of presynaptic endocytic zone membrane	0.0253792	1.59552	77.7535	2	Q8MMD2, A0A0B4K631
GO:0030424~axon	0.0258881	1.5869	3.075	7	Q00963, M9PBZ1, Q9VB15, M9PGG4, Q00174, M9NGG5, A4V1P2
GO:0005884~actin filament	0.0316564	1.49954	10.6028	3	A8DYJ2, M9MRJ4, Q9VDF4
GO:0061802~anterior cell cortex	0.0378279	1.42219	51.8357	2	A0A0B4KEY4, A1Z9J3
GO:0098831~presynaptic active zone cytoplasmic component	0.0378279	1.42219	51.8357	2	A0A0B4JDC9, Q9V483
GO:0036062~presynaptic periactive zone	0.0378279	1.42219	51.8357	2	M9MRX4, A8JNM5, Q00174
GO:0016327~apicolateral plasma membrane	0.0401071	1.39678	9.33042	3	E1JIZ0, E2QD98, M9PHK8
GO:0005887~integral component of plasma membrane	0.0427867	1.36869	1.9479	12	P17644, A0A0B4KFZ4, P91685, Q8IPI3, M9PBZ1, X2JAT7, A8JNX5, E1JHT2, Q9V491, A0A0B4LID6, Q9V3Q9, Q7KT97
