# Supplementary material for: Executioner caspase is proximal to Fasciclin 3 which facilitates non-lethal activation in Drosophila olfactory receptor neurons
Source: eLife. 2025 Jun 17;13:RP99650. doi: 10.7554/eLife.99650 (PMC12173457; doi:10.7554/eLife.99650)
Supplement: Supplementary file 3. — A list of the fly strains. Genotype, Map, Source or Reference, and Stock# are listed. [file elife-99650-supp3.xlsx]

## Sheet: S1. Fly stock list
Genotype	Map	Source or Reference	Stock #
w1118	Chr X
Drice::V5::TurboID	Chr III	DOI: 10.1073/pnas.1904647116
Dcp-1::V5::TurboID	Chr II	DOI: 10.1073/pnas.1904647116
Dronc::V5::TurboID	Chr III	DOI: 10.1073/pnas.1904647116
Pebbled-Gal4	Chr X	Bloomington Drosophila Stock Center	#80570
Orb0449-Gal4	Chr III	Bloomington Drosophila Stock Center	#63325
GH146-Gal4	Chr II	Bloomington Drosophila Stock Center	#30026
UAS-Drice-RNAi	Chr II	Vienna Drosophila Resource Center	#28065
Fas3::EGFP::FlAsH::StrepII::TEV::3xFLAG	Chr II	Bloomington Drosophila Stock Center	#59809
UASz-Fas3A::3xFLAG	attP2 site on Chr III	This study
UASz-Fas3B::3xFLAG	attP2 site on Chr III	This study
UASz-Fas3C::3xFLAG	attP2 site on Chr III	This study
UASz-Fas3D::3xFLAG	attP2 site on Chr III	This study
UASz-Fas3G::3xFLAG	attP2 site on Chr III	This study
Ubi-FRT-STOP-FRT-mCD8::DQVD::QF2	attP40 site on Chr II	This study
Ubi-FRT-STOP-FRT-mCD8::DQVA::QF2	attP40 site on Chr II	This study
UAS-FLP	Chr III	Kyoto Stock Center	#107788
QUAS-tdTomato::3xHA	Chr III	Bloomington Drosophila Stock Center	#30005
ELAV-Gal4	Chr II	Bloomington Drosophila Stock Center	#8765
Or42b-Gal4	Chr II	Bloomington Drosophila Stock Center	#9971
UAS-RedStinger	Chr III	Bloomington Drosophila Stock Center	#8547
UASz-3xFLAG::mNeonGreen	attP40 site on Chr II	This study
UASz-Drice::myc::mNeonGreen	attP40 site on Chr II	This study
UASz-V5::TurboID	attP2 site on Chr III	This study
UASz-Dronc::V5::TurboID	attP2 site on Chr III	This study
UASz-DroncCG::V5::TurboID	attP2 site on Chr III	This study
UASz-Dcp-1::V5::TurboID	attP2 site on Chr III	This study
UASz-Dcp-1CG::V5::TurboID	attP2 site on Chr III	This study
UASz-Drice::V5::TurboID	attP2 site on Chr III	This study
UASz-DriceCG::V5::TurboID	attP2 site on Chr III	This study
UAS-Diap-1::VENUS	Chr II	DOI: 10.1083/jcb.200905110
UAS-Dronc-RNAi	Chr II	DOI: 10.1038/sj.emboj.7600822
UAS-DroncDN::EGFP	Chr II	DOI: 10.1093/emboj/cdf306
UAS-LacZ-RNAi	Chr II	gift from Dr. Richard Carthew
UAS-Fas3-RNAi#1	Chr III	Vienna Drosophila Resource Center	#940
UAS-Fas3-RNAi#2	Chr III	Vienna Drosophila Resource Center	#3091
UAS-Fas3G-RNAi	attP40 site on Chr II	This study
