# Supplementary material for: Executioner caspase is proximal to Fasciclin 3 which facilitates non-lethal activation in Drosophila olfactory receptor neurons
Source: eLife. 2025 Jun 17;13:RP99650. doi: 10.7554/eLife.99650 (PMC12173457; doi:10.7554/eLife.99650)
Supplement: Supplementary file 4. — Detailed genotypes and their related figure # are presented. [file elife-99650-supp4.xlsx]

## Sheet: S2. Detailed genotypes
Related Figure #	Detailed Genotype
Figure 1B, C (Left to Right, Top to Bottom)	w1118/Y
	w/Y; Dcp-1::V5::TurboID/+
	w/Y;; Drice::V5::TurboID/+
	w/Y;; Dronc::V5::TurboID/+
Figure 1D (Left to Right)	w/Y; UAS-Drice-RNAi/+; Drice::V5::TurboID/+
	w, Pebbled-Gal4/Y; UAS-Drice-RNAi/+; Drice::V5::TurboID/+
	w/Y; UAS-Drice-RNAi/GH146-Gal4; Drice::V5::TurboID/+
	w/Y; UAS-Drice-RNAi/+; Drice::V5::TurboID/Orb0449-Gal4
Figure 1E (Left to Right)	w1118/Y
	w/Y;; Drice::V5::TurboID/+
Figure 1G (Left to Right)	w1118/Y
	w/Y;; Drice::V5::TurboID/+
Figure 1–figure supplement 1A (Left to Right)	w1118/Y
	w/Y;; Drice::V5::TurboID/+
	w1118
	w/w1118;; Drice::V5::TurboID/+
Figure 1–figure supplement 1B (Left to Right)	w; UAS-Drice-RNAi/+; Drice::V5::TurboID/+
	w, Pebbled-Gal4/w; UAS-Drice-RNAi/+; Drice::V5::TurboID/+
	w; UAS-Drice-RNAi/GH146-Gal4; Drice::V5::TurboID/+
	w; UAS-Drice-RNAi/+; Drice::V5::TurboID/Orb0449-Gal4
Figure 2A (Left to Right)	w1118/Y
	w/Y;; Drice::V5::TurboID/+
Figure 2B (Top to Bottom, Left to Right)	w1118/Y
	w/Y;; Drice::V5::TurboID/+
	w/Y; Fas3::EGFP::FlAsH::StrepII::TEV::3xFLAG/+
	w/Y; Fas3:: EGFP::FlAsH::StrepII::TEV::3xFLAG/+; Drice::V5::TurboID/+
Figure 2E (Left to Right)	w, Pebbled-Gal4/w or Y
	w, Pebbled-Gal4/w or Y;; UASz-Fas3A::3xFLAG/+
	w, Pebbled-Gal4/w or Y;; UASz-Fas3B::3xFLAG/+
	w, Pebbled-Gal4/w or Y;; UASz-Fas3C::3xFLAG/+
	w, Pebbled-Gal4/w or Y;; UASz-Fas3D::3xFLAG/+
	w, Pebbled-Gal4/w or Y;; UASz-Fas3G::3xFLAG/+
Figure 2F (Left to Right)	w1118/Y
	w/Y;; Drice::V5::TurboID/+
Figure 2G (Left to Right)	w, Pebbled-Gal4/w or Y;; Drice::V5::TurboID/+
	w, Pebbled-Gal4/w or Y;; Drice::V5::TurboID/UASz-Fas3A::3xFLAG
	w, Pebbled-Gal4/w or Y;; Drice::V5::TurboID/UASz-Fas3B::3xFLAG
	w, Pebbled-Gal4/w or Y;; Drice::V5::TurboID/UASz-Fas3C::3xFLAG
	w, Pebbled-Gal4/w or Y;; Drice::V5::TurboID/UASz-Fas3D::3xFLAG
	w, Pebbled-Gal4/w or Y;; Drice::V5::TurboID/UASz-Fas3G::3xFLAG
Figure 2–figure supplement 2A (Left to Right)	w, Pebbled-Gal4/w or Y;; Drice::V5::TurboID/+
	w, Pebbled-Gal4/w or Y;; Drice::V5::TurboID/UASz-Fas3C::3xFLAG
	w, Pebbled-Gal4/w or Y;; Drice::V5::TurboID/UASz-Fas3G::3xFLAG
Figure 3C (Top to Bottom)	w/Y; Ubi-FRT-STOP-FRT-mCD8::DQVD::QF2/+; UAS-FLP, QUAS-tdTomato::3xHA/+
	w/Y; Ubi-FRT-STOP-FRT-mCD8::DQVA::QF2/ELAV-Gal4; UAS-FLP, QUAS-tdTomato::3xHA/+
	w/Y; Ubi-FRT-STOP-FRT-mCD8::DQVD::QF2/ELAV-Gal4; UAS-FLP, QUAS-tdTomato::3xHA/+
Figure 3D (Top to Bottom)	w/Y; Ubi-FRT-STOP-FRT-mCD8::DQVA::QF2/Or42b-Gal4; UAS-FLP, QUAS-tdTomato::3xHA/+
	w/Y; Ubi-FRT-STOP-FRT-mCD8::DQVD::QF2/Or42b-Gal4; UAS-FLP, QUAS-tdTomato::3xHA/+
Figure 4A, B (Top to Bottom, Left to Right)	w/Y; Or42b-Gal4/+; UAS-RedStinger/UASz-V5::TurboID
	w/Y; Or42b-Gal4/+; UAS-RedStinger/UASz-DroncCG::V5::TurboID
	w/Y; Or42b-Gal4/+; UAS-RedStinger/UASz-Dronc::V5::TurboID
	w/Y; Or42b-Gal4/+; UAS-RedStinger/UASz-Dcp-1CG::V5::TurboID
	w/Y; Or42b-Gal4/+; UAS-RedStinger/UASz-Dcp-1::V5::TurboID
	w/Y; Or42b-Gal4/+; UAS-RedStinger/UASz-DriceCG::V5::TurboID
	w/Y; Or42b-Gal4/+; UAS-RedStinger/UASz-Drice::V5::TurboID
Figure 4C, D (Top to Bottom, Left to Right)	w/Y; Or42b-Gal4/UASz-3xFLAG::mNeonGreen; UAS-RedStinger/+
	w/Y; Or42b-Gal4/+; UAS-RedStinger/UASz-Fas3G::3xFLAG
	w/Y; Or42b-Gal4/UASz-Drice::myc::mNeonGreen; UAS-RedStinger/+
	w/Y; Or42b-Gal4/UASz-Drice::myc::mNeonGreen; UAS-RedStinger/UASz-Fas3G::3xFLAG
Figure 4E (Top to Bottom)	w/Y; Or42b-Gal4/UASz-3xFLAG::mNeonGreen
	w/Y; Or42b-Gal4, Ubi-FRT-STOP-FRT-mCD8::DQVD::QF2/UASz-3xFLAG::mNeonGreen; UAS-FLP, QUAS-tdTomato::3xHA/+
Figure 4F, G (Top to Bottom, Left to Right)	w/w or Y; Or42b-Gal4, Ubi-FRT-STOP-FRT-mCD8::DQVD::QF2/UASz-3xFLAG::mNeonGreen; UAS-FLP, QUAS-tdTomato::3xHA/+
	w/w or Y; Or42b-Gal4, Ubi-FRT-STOP-FRT-mCD8::DQVD::QF2/+; UAS-FLP, QUAS-tdTomato::3xHA/UASz-Fas3G::3xFLAG
	w/w or Y; Or42b-Gal4, Ubi-FRT-STOP-FRT-mCD8::DQVD::QF2/UASz-Drice::myc::mNeonGreen; UAS-FLP, QUAS-tdTomato::3xHA/+
	w/w or Y; Or42b-Gal4, Ubi-FRT-STOP-FRT-mCD8::DQVD::QF2/UASz-Drice::myc::mNeonGreen; UAS-FLP, QUAS-tdTomato::3xHA/UASz-Fas3G::3xFLAG
Figure 4H, I (Top to Bottom, Left to Right)	w/w or Y; Or42b-Gal4, Ubi-FRT-STOP-FRT-mCD8::DQVD::QF2/UASz-3xFLAG::mNeonGreen; UAS-FLP, QUAS-tdTomato::3xHA/+
	w/w or Y; Or42b-Gal4, Ubi-FRT-STOP-FRT-mCD8::DQVD::QF2/+; UAS-FLP, QUAS-tdTomato::3xHA/UASz-Fas3G::3xFLAG
	w/w or Y; Or42b-Gal4, Ubi-FRT-STOP-FRT-mCD8::DQVD::QF2/UAS-Diap-1::VENUS; UAS-FLP, QUAS-tdTomato::3xHA/UASz-Fas3G::3xFLAG
Figure 4–figure supplement 1C, D (Top to Bottom, Left to Right)	w/w or Y; Or42b-Gal4, Ubi-FRT-STOP-FRT-mCD8::DQVD::QF2/UAS-LacZ-RNAi; UAS-FLP, QUAS-tdTomato::3xHA/+
	w/w or Y; Or42b-Gal4, Ubi-FRT-STOP-FRT-mCD8::DQVD::QF2/+; UAS-FLP, QUAS-tdTomato::3xHA/UAS-Fas3-RNAi #1
	w/w or Y; Or42b-Gal4, Ubi-FRT-STOP-FRT-mCD8::DQVD::QF2/+; UAS-FLP, QUAS-tdTomato::3xHA/UAS-Fas3-RNAi #2
	w/w or Y; Or42b-Gal4, Ubi-FRT-STOP-FRT-mCD8::DQVD::QF2/UAS-Fas3G-RNAi; UAS-FLP, QUAS-tdTomato::3xHA/+
Figure 4–figure supplement 1E (Left to Right, Top to Bottom)	w, Pebbled-Gal4/Y; UASz-Drice::myc::mNeonGreen/+
	w, Pebbled-Gal4/Y; UASz-Drice::myc::mNeonGreen/+; UASz-Fas3G::3xFLAG/+
	w, Pebbled-Gal4/Y; UASz-Drice::myc::mNeonGreen/+; UAS-Fas3-RNAi #1/+
	w, Pebbled-Gal4/Y; UASz-Drice::myc::mNeonGreen/+; UAS-Fas3-RNAi #2/+
	w, Pebbled-Gal4/Y; UASz-Drice::myc::mNeonGreen/UAS-Fas3G-RNAi
Figure 5A (Left to Right)	w, Pebbled-Gal4/Y
	w, Pebbled-Gal4/Y;; Dronc::V5::TurboID/+
	w, Pebbled-Gal4/Y;; Dronc::V5::TurboID/UASz-Fas3G::3xFLAG
Figure 5B (Left to Right)	w, Pebbled-Gal4/Y;; Dronc::V5::TurboID/+
	w, Pebbled-Gal4/Y;; Dronc::V5::TurboID/UASz-Fas3G::3xFLAG
	w, Pebbled-Gal4/Y;; Dronc::V5::TurboID/UASz-Fas3C::3xFLAG
Figure 5C, D (Top to Bottom, Left to Right)	w/w or Y; Or42b-Gal4, Ubi-FRT-STOP-FRT-mCD8::DQVD::QF2/UASz-3xFLAG::mNeonGreen; UAS-FLP, QUAS-tdTomato::3xHA/+
	w/w or Y; Or42b-Gal4, Ubi-FRT-STOP-FRT-mCD8::DQVD::QF2/+; UAS-FLP, QUAS-tdTomato::3xHA/UASz-Fas3G::3xFLAG
	w/w or Y; Or42b-Gal4, Ubi-FRT-STOP-FRT-mCD8::DQVD::QF2/UAS-Dronc-RNAi; UAS-FLP, QUAS-tdTomato::3xHA/UASz-Fas3G::3xFLAG
	w/w or Y; Or42b-Gal4, Ubi-FRT-STOP-FRT-mCD8::DQVD::QF2/UAS-DroncDN::EGFP; UAS-FLP, QUAS-tdTomato::3xHA/UASz-Fas3G::3xFLAG
Figure 5E (Left to Right)	w, Pebbled-Gal4/Y;; Drice::V5::TurboID/+
	w, Pebbled-Gal4/Y;; Drice::V5::TurboID/UASz-Fas3G::3xFLAG
	w, Pebbled-Gal4/Y; +/UAS-Dronc-RNAi; Drice::V5::TurboID/UASz-Fas3G::3xFLAG
	w, Pebbled-Gal4/Y; +/UAS-DroncDN::EGFP; Drice::V5::TurboID/UASz-Fas3G::3xFLAG
Figure 6B	w/Y; Or42b-Gal4/UASz-3xFLAG::mNeonGreen
Figure 6C	w/Y; Or42b-Gal4/UASz-3xFLAG::mNeonGreen
	w/Y; Or42b-Gal4/UAS-DroncDN::EGFP
	w/Y; Or42b-Gal4/+; +/UASz-Fas3G::3xFLAG
	w/Y; Or42b-Gal4/UAS-DroncDN::EGFP; +/UASz-Fas3G::3xFLAG
