# Supplementary material for: Executioner caspase is proximal to Fasciclin 3 which facilitates non-lethal activation in Drosophila olfactory receptor neurons
Source: eLife. 2025 Jun 17;13:RP99650. doi: 10.7554/eLife.99650 (PMC12173457; doi:10.7554/eLife.99650)
Supplement: Supplementary file 5. — Gradient settings for LC analysis are presented. [file elife-99650-supp5.xlsx]

## Sheet: S5. LC settings
Time	Duration	%B	Flow rate (nl/min)
0	0	0	300
5	5	10	300
60	55	40	300
62	2	95	300
80	18	95	300
